# Supplementary material for: Immunotoxin-mediated depletion of Gag-specific CD8+ T cells undermines natural control of SIV
Source: PubMed Central journal article supplement (PMC11383179; doi:10.1172/jci.insight.174168), 2024-06-17
Supplement: jciinsight-9-174168-s191.pdf [file jciinsight-9-174168-s191.pdf]

## SUPPLEMENTAL MATERIAL

### **Immunotoxin-mediated depletion of Gag-specific CD8<sup>+</sup> T cells undermines natural control of SIV**

Jennifer Simpson<sup>1</sup>, Carly E. Starke,<sup>1,2</sup> Alexandra M. Ortiz<sup>1</sup>, Amy Ransier<sup>3</sup>, Sam Darko<sup>3</sup>, Sian Llewellyn-Lacey<sup>4</sup>, Christine M. Fennessey<sup>5</sup>, Brandon F. Keele<sup>5</sup>, Daniel C. Douek<sup>3</sup>, David A. Price<sup>4,6</sup>, Jason M. Brenchley<sup>1</sup>

1. Barrier Immunity Section, Laboratory of Viral Diseases, National Institute of Allergy and Infectious Diseases, National Institutes of Health, Bethesda, MD 20892, USA.
2. Stem Cell and Gene Therapy Program, Fred Hutchinson Cancer Research Center, Seattle, WA 98109, USA.
3. Human Immunology Section, Vaccine Research Center, National Institute of Allergy and Infectious Diseases, National Institutes of Health, Bethesda, MD 20892, USA.
4. Division of Infection and Immunity, Cardiff University School of Medicine, University Hospital of Wales, Cardiff CF14 4XN, UK.
5. AIDS and Cancer Virus Program, Frederick National Laboratory for Cancer Research, National Cancer Institute, National Institutes of Health, Frederick, MD 21702, USA.
6. Systems Immunity Research Institute, Cardiff University School of Medicine, University Hospital of Wales, Cardiff CF14 4XN, UK.

Address correspondence to: Jason M. Brenchley, Barrier Immunity Section, Laboratory of Viral Diseases, Building 4, Room 201, 4 Memorial Drive, National Institute of Allergy and Infectious Diseases, National Institutes of Health, Bethesda, MD 20892, USA. Phone: +1 3014961498. Email: [jbrenchl@niaid.nih.gov](mailto:jbrenchl@niaid.nih.gov).

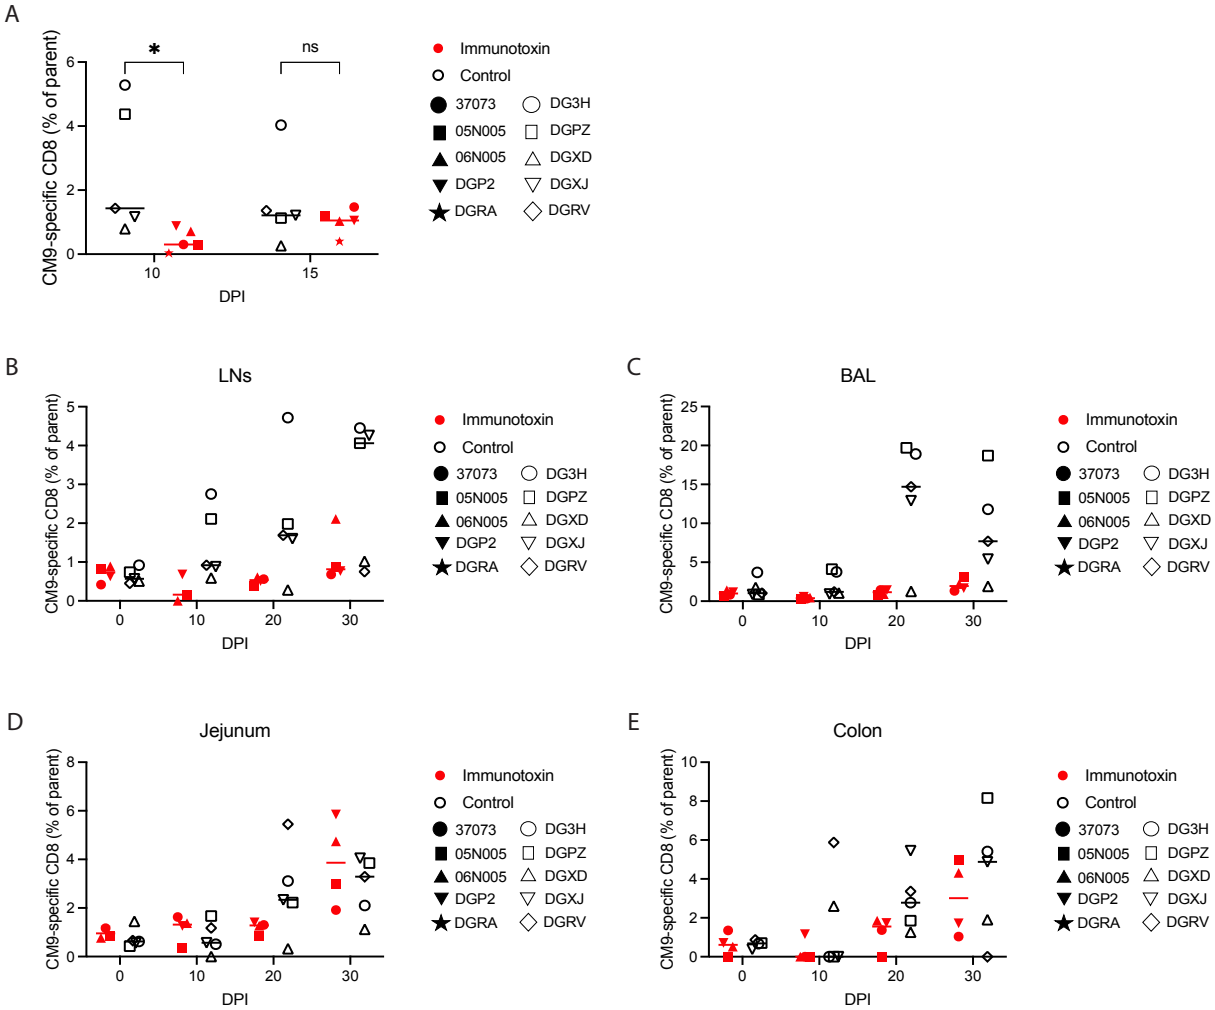

**Supplemental Figure 1. Immunotoxin administration does not alter CM9-specific CD8<sup>+</sup> T cell frequencies in tissues during acute infection with SIV.** Experimental details as in **Figure 2**. **(A)** CM9-specific CD8<sup>+</sup> T cell frequencies among PBMCs (parent = CD8<sup>+</sup> T cells). **(B)** CM9-specific CD8<sup>+</sup> T cell frequencies in LNs (parent = CD8<sup>+</sup> T cells). **(C)** CM9-specific CD8<sup>+</sup> T cell frequencies in BAL (parent = CD8<sup>+</sup> T cells). **(D)** CM9-specific CD8<sup>+</sup> T cell frequencies in jejunum (parent = CD8<sup>+</sup> T cells). **(E)** CM9-specific CD8<sup>+</sup> T cells in colon (parent = CD8<sup>+</sup> T cells). Each symbol represents one macaque (A–E). Horizontal bars indicate median values (A–E). Significance was determined using a two-way ANOVA with Šídák correction. DPI, days post-infection; ns, not significant.



**Supplemental Figure 2. Immunotoxin administration does not modulate germline contributions to the clonotypic repertoire of CM9-specific CD8<sup>+</sup> T cells during acute infection with SIV.** Experimental details as in **Figure 2.** **(A)** Heatmap analysis of TRBV segment use among CM9-specific CD8<sup>+</sup> T cell repertoires from control and immunotoxin-treated macaques. **(B)** Heatmap analysis of TRBJ segment use among CM9-specific CD8<sup>+</sup> T cell repertoires from control and immunotoxin-treated macaques. DPI, days post-infection.

A

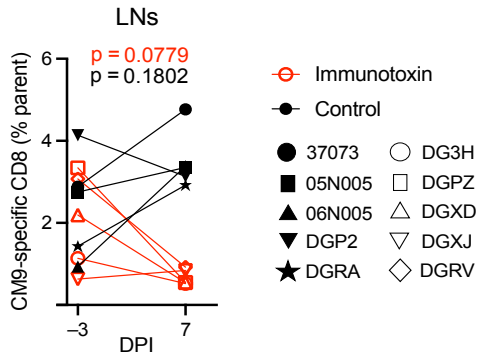

B

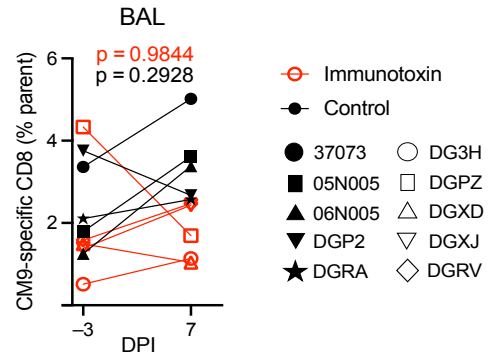

C

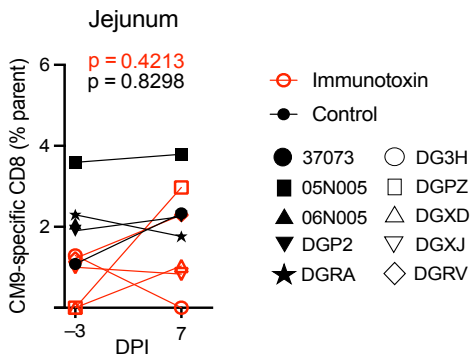

D

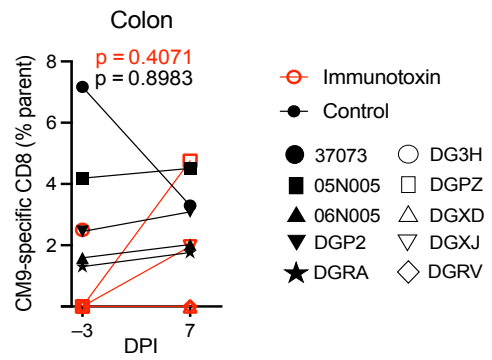

E

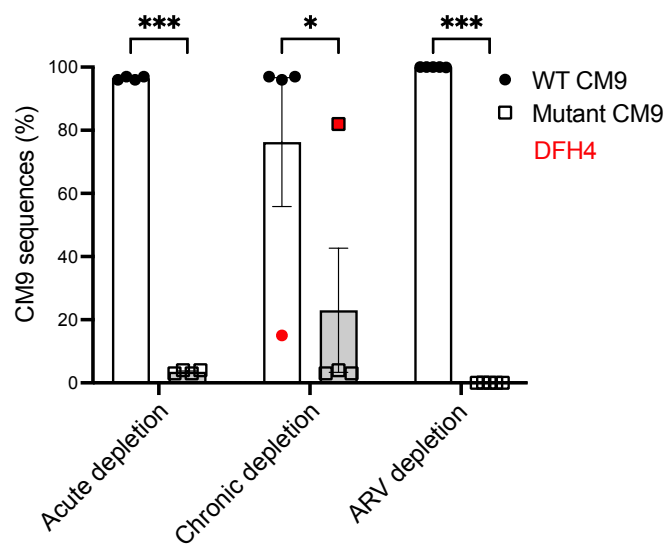

**Supplemental Figure 3. Immunotoxin administration does not alter CM9-specific CD8<sup>+</sup> T cell frequencies in tissues during treatment with ARVs.** Experimental details as in **Figure 4**. **(A)** CM9-specific CD8<sup>+</sup> T cell frequencies in LNs (parent = CD8<sup>+</sup> T cells). **(B)** CM9-specific CD8<sup>+</sup> T cell frequencies in BAL (parent = CD8<sup>+</sup> T cells). **(C)** CM9-specific CD8<sup>+</sup> T cell frequencies in jejunum (parent = CD8<sup>+</sup> T cells). **(D)** CM9-specific CD8<sup>+</sup> T cell frequencies in colon (parent = CD8<sup>+</sup> T cells). **(E)** Proportions of wildtype (WT) and mutant CM9 epitope sequences identified in plasma samples. Each symbol represents one macaque (A–E). Significance was determined using a paired t test (A–D) or a mixed-effects ANOVA with Šídák correction (E). \*p < 0.05, \*\*\*p < 0.001. DPI, days post-immunotoxin.

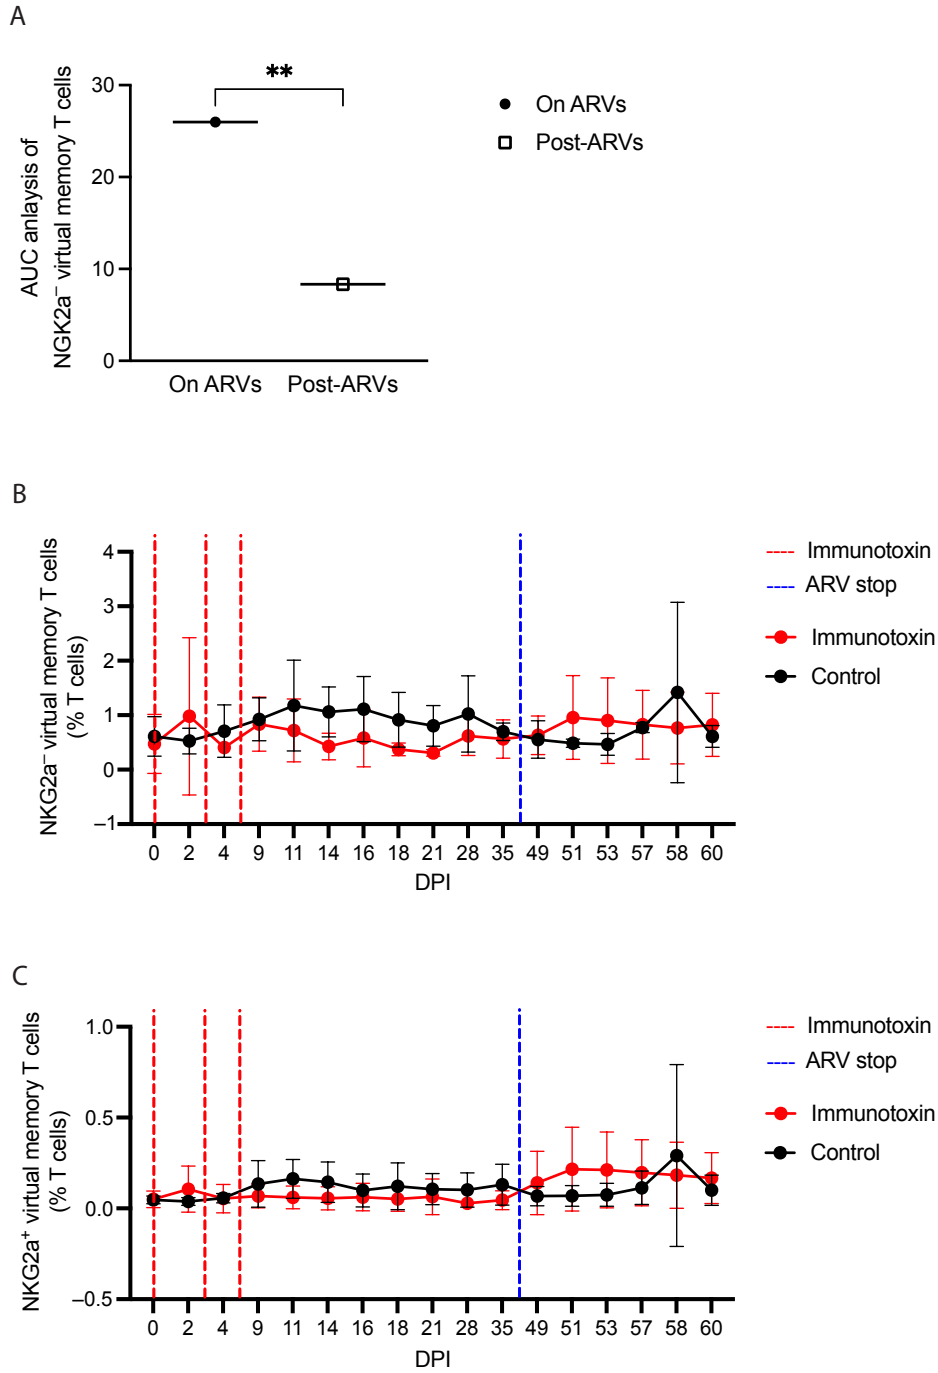

**Supplemental Figure 4. T<sub>VM</sub> cells are present in the circulation during treatment with ARVs.** Experimental details as in **Figure 4**. **(A)** AUC analysis of NKG2a<sup>-</sup> T<sub>VM</sub> cells from all macaques across all time points during and after treatment with ARVs. **(B)** NKG2a<sup>-</sup> T<sub>VM</sub> cell frequencies among all circulating T cells in control and immunotoxin-treated macaques. **(C)** NKG2a<sup>+</sup> T<sub>VM</sub> cell

frequencies among all circulating T cells in control and immunotoxin-treated macaques. Horizontal bars indicate mean values (A). Data are shown as mean  $\pm$  SD (B, C). Significance was determined using a paired t-test (A) or a two-way ANOVA with Dunnett correction (B, C). \*\*p < 0.01. DPI, days post-immunotoxin.



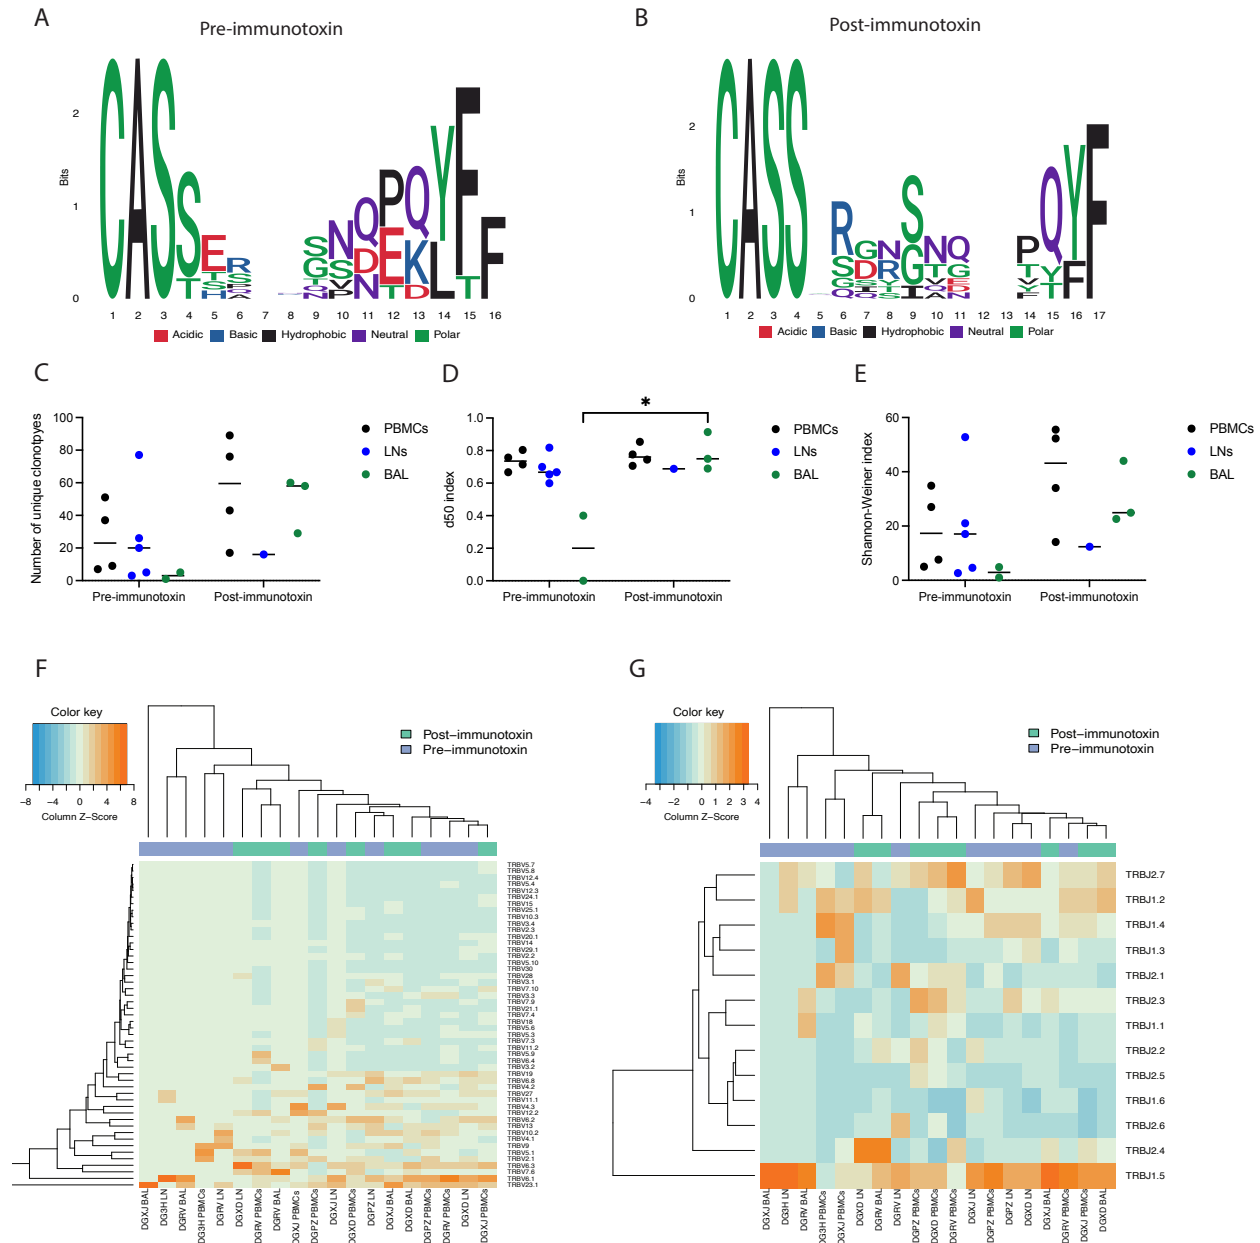

**Supplemental Figure 5. Immunotoxin administration does not modulate the clonotypic architecture of CM9-specific CD8<sup>+</sup> T cell populations during treatment with ARVs.** Experimental details as in **Figure 4**. **(A)** Logo plots and chemical classification of amino acids spanning the CDR3 $\beta$  loops of the top 10 pooled clonotypes before immunotoxin administration. **(B)** Logo plots and chemical classification of amino acids spanning the CDR3 $\beta$  loops of the top 10 pooled clonotypes after immunotoxin administration. **(C)** Repertoire diversity measured using

the number of unique clonotypes for CM9-specific CD8<sup>+</sup> T cell populations isolated before and after immunotoxin administration. **(D)** Repertoire diversity measured using the d50 index for CM9-specific CD8<sup>+</sup> T cell populations isolated before and after immunotoxin administration. **(E)** Repertoire diversity measured using the Shannon-Weiner index for CM9-specific CD8<sup>+</sup> T cell populations isolated before and after immunotoxin administration. **(F)** Heatmap analysis of TRBV segment use among CM9-specific CD8<sup>+</sup> T cell repertoires before and after immunotoxin administration. **(G)** Heatmap analysis of TRBJ segment use among CM9-specific CD8<sup>+</sup> T cell repertoires before and after immunotoxin administration. Each symbol represents one macaque (C–E). Horizontal bars indicate median values (C–E). Significance was determined using a mixed-effects ANOVA with Šídák correction (C–E). \* $p < 0.05$ . Plots incorporate all sequences with a frequency of >2%. Post-immunotoxin = day 7 (B–G).

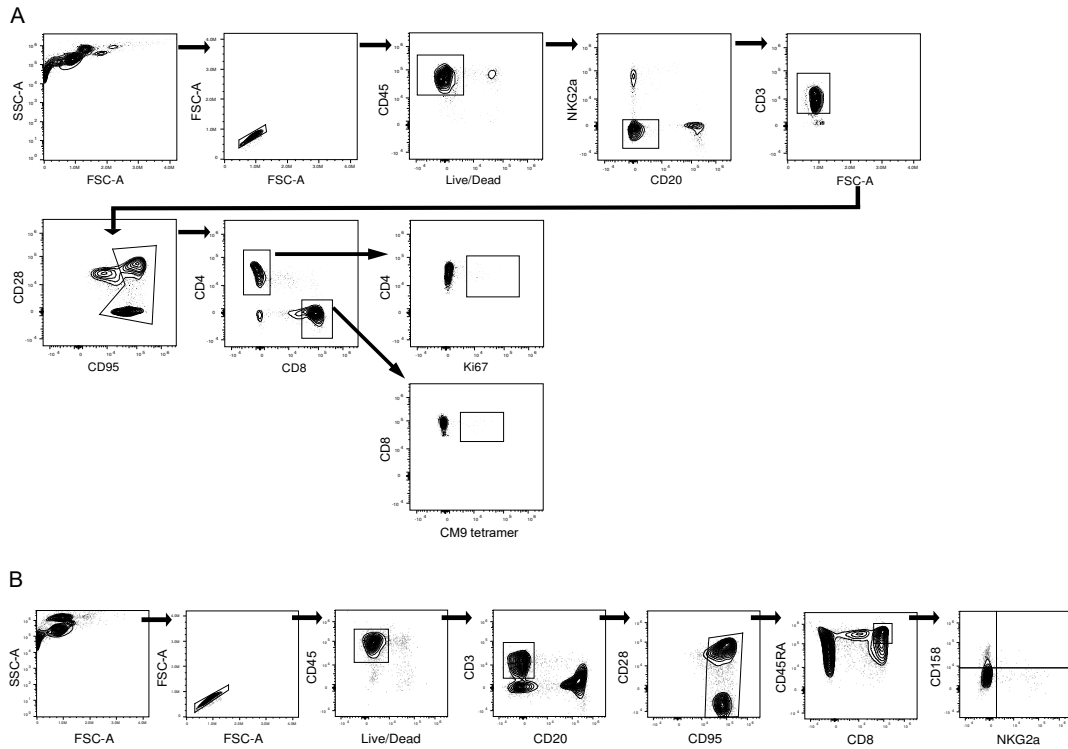

**Supplemental Figure 6. Flow cytometric gating strategies. (A)** Gating strategy for the identification of memory CD8<sup>+</sup> T cells, CM9-specific CD8<sup>+</sup> T cells, memory CD4<sup>+</sup> T cells, and Ki67<sup>+</sup> CD4<sup>+</sup> T cells. **(B)** Gating strategy for the identification of NKG2a<sup>-</sup> and NKG2a<sup>+</sup> T<sub>VM</sub> cells.

**Supplemental Table 1. Participant macaques in the acute infection study.**

| <b>Animal</b> | <b>Sex</b> | <b>Treatment</b>                            | <b>Symbol</b> |
|---------------|------------|---------------------------------------------|---------------|
| 37073         | Female     | 3 × 350 pmol/kg of CM9 tetramer-immunotoxin | ●             |
| 05N005        | Female     | 3 × 350 pmol/kg of CM9 tetramer-immunotoxin | ■             |
| 06N005        | Female     | 3 × 350 pmol/kg of CM9 tetramer-immunotoxin | ▲             |
| DGP2          | Male       | 3 × 350 pmol/kg of CM9 tetramer-immunotoxin | ▼             |
| DGRA          | Male       | 3 × 350 pmol/kg of CM9 tetramer-immunotoxin | ★             |
| DG3H          | Male       | None                                        | ○             |
| DGPZ          | Male       | None                                        | □             |
| DGXD          | Male       | None                                        | △             |
| DGXJ          | Male       | None                                        | ▽             |
| DGRV          | Male       | None                                        | ◇             |

**Supplemental Table 2. Participant macaques in the ARV study.**

| Animal | Sex    | ARV regimen                                                        | Initial plasma VL (copies/mL) | Treatment                                   | Symbol |
|--------|--------|--------------------------------------------------------------------|-------------------------------|---------------------------------------------|--------|
| 37073  | Female | 1mL/kg/day sc [FTC (40 mg/kg) + TDF (5.1 mg/kg) + DTG (2.5 mg/kg)] | Below LOD                     | None                                        | ●      |
| 05N005 | Female | 1mL/kg/day sc [FTC (40 mg/kg) + TDF (5.1 mg/kg) + DTG (2.5 mg/kg)] | Below LOD                     | None                                        | ■      |
| 06N005 | Female | 1mL/kg/day sc [FTC (40 mg/kg) + TDF (5.1 mg/kg) + DTG (2.5 mg/kg)] | Below LOD                     | None                                        | ▲      |
| DGP2   | Male   | 1mL/kg/day sc [FTC (40 mg/kg) + TDF (5.1 mg/kg) + DTG (2.5 mg/kg)] | Below LOD                     | None                                        | ▼      |
| DGRA   | Male   | 1mL/kg/day sc [FTC (40 mg/kg) + TDF (5.1 mg/kg) + DTG (2.5 mg/kg)] | Below LOD                     | None                                        | ★      |
| DG3H   | Male   | 1mL/kg/day sc [FTC (40 mg/kg) + TDF (5.1 mg/kg) + DTG (2.5 mg/kg)] | Below LOD                     | 3 × 350 pmol/kg of CM9 tetramer-immunotoxin | ○      |
| DGPZ   | Male   | 1mL/kg/day sc [FTC (40 mg/kg) + TDF (5.1 mg/kg) + DTG (2.5 mg/kg)] | Below LOD                     | 3 × 350 pmol/kg of CM9 tetramer-immunotoxin | □      |
| DGXD   | Male   | 1mL/kg/day sc [FTC (40 mg/kg) + TDF (5.1 mg/kg) + DTG (2.5 mg/kg)] | Below LOD                     | 3 × 350 pmol/kg of CM9 tetramer-immunotoxin | △      |
| DGXJ   | Male   | 1mL/kg/day sc [FTC (40 mg/kg) + TDF (5.1 mg/kg) + DTG (2.5 mg/kg)] | 65                            | 3 × 350 pmol/kg of CM9 tetramer-immunotoxin | ▽      |
| DGRV   | Male   | 1mL/kg/day sc [FTC (40 mg/kg) + TDF (5.1 mg/kg) + DTG (2.5 mg/kg)] | Below LOD                     | 3 × 350 pmol/kg of CM9 tetramer-immunotoxin | ◇      |

**Supplemental Table 3. Participant macaques in the chronic infection study.**

| <b>Animal</b> | <b>Sex</b> | <b>Initial plasma VL<br/>(copies/mL)</b> | <b>Treatment</b>                            | <b>Symbol</b>                                                                       |
|---------------|------------|------------------------------------------|---------------------------------------------|-------------------------------------------------------------------------------------|
| DFH4          | Male       | 1,200,000                                | 1 × 325 pmol/kg of CM9 tetramer-immunotoxin |  |
| DGME          | Male       | 4,400,000                                | 1 × 650 pmol/kg of CM9 tetramer-immunotoxin |  |
| DG2V          | Male       | 9,000,000                                | 1 × 1.3 nmol/kg of CM9 tetramer-immunotoxin |  |
| 08D030        | Male       | 5,100                                    | 2 × 350 pmol/kg of CM9 tetramer-immunotoxin |  |
| DGT4          | Male       | 940                                      | 2 × 350 pmol/kg of CM9 tetramer-immunotoxin |  |

**Supplemental Table 4. Antibodies used for flow cytometry and cell sorting.**

| <b>Antigen</b> | <b>Fluorochrome</b> | <b>Clone</b> | <b>Supplier</b>          | <b>Catalog ID</b> |
|----------------|---------------------|--------------|--------------------------|-------------------|
| Ki67           | FITC                | 35/Ki-67     | BD Biosciences           | 556026            |
| CD8            | Pacific Blue        | RPA-T8       | BD Biosciences           | 558207            |
| NKG2a          | PE                  | Z199         | Beckman Coulter          | 1M3291U           |
| CD28           | ECD                 | CD28.2       | Beckman Coulter          | 6607111           |
| CD45RA         | BV750               | 5H9          | BD Biosciences           | 747465            |
| CD3            | PerCP-Cy5.5         | SP34-2       | BD Biosciences           | 552852            |
| CD4            | BV650               | OKT4         | BioLegend                | 317436            |
| CD45           | BV786               | D058-1283    | BD Biosciences           | 563861            |
| CD95           | PE-Cy5              | DX2          | BioLegend                | 305610            |
| CD20           | APC-H7              | 2H7          | BD Biosciences           | 560734            |
| CD158          | BV711               | HP-MA4       | BD Biosciences           | 752507            |
| Live/Dead      | Aqua Blue           | N/A          | Thermo Fisher Scientific | L34957            |
